# Supplementary material for: Predicting Associations of miRNAs and Candidate Gastric Cancer Genes for Nanomedicine
Source: PubMed Central journal article supplement (PMC8000878; doi:10.3390/nano11030691), 2021-03-10
Supplement: nanomaterials-11-00691-s001.pdf [file nanomaterials-11-00691-s001.pdf]

# Predicting Associations of miRNAs and Candidate Gastric Cancer Genes for Nanomedicine

Aigul Akimniyazova <sup>1</sup>, Anna Pyrkova <sup>1</sup>, Vladimir Uversky <sup>2</sup> and Anatoliy Ivashchenko <sup>1,\*</sup>

<sup>1</sup> Department of Biotechnology, Al-Farabi Kazakh National University, Almaty 050040, Kazakhstan; akimniyazova.aigul@med-kaznu.com (A.A.); anna.pyrkova@kaznu.kz (A.P.)

<sup>2</sup> Department of Molecular Medicine, Morsani College of Medicine, University of South Florida, Tampa, FL 33612, USA; vuvversky@usf.edu

\* Correspondence: a.iavashchenko@gmail.com

**Table S1.** The list of candidate gastric cancer genes.

| Gene           | PMID     | Gene          | PMID     | Gene          | PMID     |
|----------------|----------|---------------|----------|---------------|----------|
| <i>ACE</i>     | 18059164 | <i>HIF1A</i>  | 26339797 | <i>PDCD4</i>  | 27021515 |
| <i>AQP3</i>    | 26768614 | <i>HPSE</i>   | 31257534 | <i>PGC</i>    | 25549793 |
| <i>ARID1A</i>  | 24744582 | <i>IGF1</i>   | 29731870 | <i>PIK3CA</i> | 26543351 |
| <i>ATM</i>     | 24841718 | <i>IGF2</i>   | 24451943 | <i>POU5F1</i> | 30628031 |
| <i>AURKA</i>   | 31871591 | <i>IGFBP3</i> | 24451943 | <i>PRKAA1</i> | 30253744 |
| <i>BRCA1</i>   | 25266802 | <i>IL10</i>   | 26088449 | <i>PTEN</i>   | 26753960 |
| <i>CASP10</i>  | 31611962 | <i>IRF1</i>   | 27866197 | <i>SFRP1</i>  | 23943784 |
| <i>CCND1</i>   | 31982864 | <i>JAK2</i>   | 25055044 | <i>SIRT1</i>  | 24107295 |
| <i>CDH1</i>    | 19168852 | <i>JUN</i>    | 22002117 | <i>SMAD2</i>  | 31773690 |
| <i>CDH17</i>   | 24465527 | <i>KRAS</i>   | 31217166 | <i>SMAD4</i>  | 28440445 |
| <i>CDKN1A</i>  | 28571676 | <i>LEP</i>    | 33061532 | <i>SP1</i>    | 24613927 |
| <i>CDX2</i>    | 29113265 | <i>LGALS3</i> | 24971481 | <i>STAT3</i>  | 32545648 |
| <i>CEACAM5</i> | 26374829 | <i>MACC1</i>  | 26919111 | <i>TBC1D9</i> | 29137307 |
| <i>CLDN18</i>  | 24073219 | <i>MAPK1</i>  | 29550487 | <i>TERT</i>   | 28423629 |
| <i>CREB1</i>   | 25825983 | <i>MDM2</i>   | 32023766 | <i>TGFBI</i>  | 25118995 |
| <i>DNMT1</i>   | 25595591 | <i>MMP2</i>   | 24072772 | <i>THBS1</i>  | 26075074 |
| <i>E2F1</i>    | 32376557 | <i>MTHFR</i>  | 25998065 | <i>TIMP2</i>  | 24440352 |
| <i>EGFR</i>    | 27997901 | <i>MUC1</i>   | 24810688 | <i>TIMP3</i>  | 27383203 |
| <i>EPHB2</i>   | 32226496 | <i>MUC6</i>   | 24816253 | <i>TP53</i>   | 27323394 |
| <i>ERBB3</i>   | 30621788 | <i>NFKB1</i>  | 26801246 | <i>TYMS</i>   | 28056823 |
| <i>EZH2</i>    | 30952377 | <i>ODC1</i>   | 28096401 | <i>VEGFC</i>  | 29393383 |
| <i>FGFR2</i>   | 26516773 | <i>OGG1</i>   | 21822670 | <i>XRCC1</i>  | 26768611 |
| <i>FLT1</i>    | 24398900 | <i>PARP1</i>  | 26540566 | <i>ZEB1</i>   | 22466758 |

**Table S2:** The characteristics of the miRNA interactions with 5'UTR mRNAs of gastric cancer candidate genes

| Gene; NX             | miRNA          | Start of site, nt | $\Delta G$ , kJ/mole | $\Delta G/\Delta G_m$ , % | Length, nt |
|----------------------|----------------|-------------------|----------------------|---------------------------|------------|
| <i>AURKA</i> ; 4.3   | miR-5095       | 420               | -108                 | 93                        | 21         |
|                      | miR-619-5p     | 426               | -119                 | 98                        | 22         |
| <i>DNMT1</i> ; 9.0   | ID02052.5p-miR | 137               | -134                 | 90                        | 24         |
| <i>EGFR</i> ; 7.8    | ID02457.3p-miR | 89                | -132                 | 95                        | 22         |
| <i>EZH2</i> ; 2.7    | ID02761.3p-miR | 120               | -138                 | 93                        | 24         |
| <i>FGFR2</i> ; 9.3   | ID03047.3p-miR | 48                | -132                 | 89                        | 24         |
| <i>HIF1A</i> ; 16.0  | miR-6789-5p    | 54                | -132                 | 90                        | 24         |
| <i>JUN</i> ; 47.0    | ID02008.5p-miR | 269               | -123                 | 91                        | 22         |
| <i>KRAS</i> ; 23.6   | ID01310.3p-miR | 17, 29            | -121, -123           | 92,94                     | 22         |
|                      | ID03332.3p-miR | 37                | -132                 | 89                        | 24         |
| <i>LGALS3</i> ; 36.9 | ID00329.3p-miR | 21                | -125                 | 91                        | 22         |
| <i>MMP2</i> ; 20.5   | ID00278.3p-miR | 110               | -123                 | 89                        | 23         |
|                      | ID03345.5p-miR | 124               | -127                 | 90                        | 24         |
| <i>NFKB1</i> ; 14.6  | ID02064.5p-miR | 128               | -132                 | 91                        | 23         |
| <i>POU5F1</i> ; 6.3  | miR-1273a      | 181               | -119                 | 90                        | 25         |

|                     |                |      |      |     |    |
|---------------------|----------------|------|------|-----|----|
|                     | miR-1273g-3p   | 203  | -113 | 96  | 21 |
|                     | miR-1273d      | 237  | -119 | 87  | 25 |
| <i>PTEN</i> ; 17.8  | ID01310.3p-miR | 531  | -119 | 90  | 22 |
|                     | ID02761.3p-miR | 533  | -132 | 89  | 24 |
|                     | ID03037.3p-miR | 536  | -121 | 90  | 22 |
| <i>SFRP1</i> ; 11.0 | ID01641.3p-miR | 111  | -132 | 89  | 24 |
| <i>SMAD2</i> ; 26.3 | ID01492.3p-miR | 16   | -129 | 100 | 23 |
| <i>TGFB1</i> ; 12.8 | ID00457.3p-miR | 209  | -129 | 95  | 22 |
|                     | ID02064.5p-miR | 211  | -132 | 91  | 23 |
| <i>THBS1</i> ; 46.5 | miR-328-5p     | 84   | -123 | 89  | 23 |
|                     | miR-6786-5p    | 88   | -119 | 93  | 21 |
|                     | ID01652.3p-miR | 113  | -129 | 92  | 23 |
| <i>TIMP2</i> ; 24.2 | ID01520.3p-miR | 60   | -123 | 92  | 21 |
|                     | ID00252.5p-miR | 61   | -134 | 90  | 24 |
|                     | ID02668.5p-miR | 219  | -127 | 88  | 24 |
|                     | ID00961.3p-miR | 239  | -132 | 93  | 23 |
|                     | ID00049.5p-miR | 269  | -136 | 90  | 24 |
|                     | ID00417.3p-miR | 278  | -123 | 94  | 21 |
|                     | ID01293.5p-miR | 281  | -127 | 94  | 22 |
| <i>TIMP3</i> ; 22.9 | ID02903.3p-miR | 1102 | -121 | 90  | 22 |
| <i>TYMS</i> ; 4.2   | ID00252.5p-miR | 87   | -132 | 89  | 24 |

**Table S3: The characteristics of the miRNA interactions with CDS mRNAs of gastric cancer candidate genes**

| Gene; NX             | miRNA          | Start of site, nt | $\Delta G$ , kJ/mole | $\Delta G/\Delta G_m$ , % | Length, nt |
|----------------------|----------------|-------------------|----------------------|---------------------------|------------|
| <i>ACE</i> ; 1.9     | ID00522.5p-miR | 62                | -125                 | 89                        | 23         |
|                      | ID02294.5p-miR | 64                | -132                 | 90                        | 24         |
| <i>ARID1A</i> ; 19.5 | ID01473.3p-miR | 1093              | -125                 | 89                        | 23         |
|                      | ID03167.3p-miR | 1399              | -123                 | 91                        | 23         |
|                      | ID01508.5p-miR | 1459              | -129                 | 90                        | 23         |
| <i>CDX2</i> ; 0.1    | ID01895.5p-miR | 416               | -138                 | 93                        | 24         |
|                      | ID00522.5p-miR | 419               | -125                 | 89                        | 23         |
|                      | ID02052.5p-miR | 608               | -136                 | 91                        | 24         |
|                      | ID01041.5p-miR | 609               | -129                 | 88                        | 24         |
|                      | miR-3960       | 613               | -117                 | 93                        | 20         |
| <i>EPHB2</i> ; 2.3   | miR-4253       | 1089              | -102                 | 100                       | 18         |
| <i>IGFBP3</i> ; 8.3  | ID02982.3p-miR | 435               | -123                 | 100                       | 21         |
| <i>MUC1</i> ; 105.0  | ID00645.5p-miR | 507               | -110                 | 93                        | 20         |
|                      | miR-6752-5p    | 510               | -119                 | 90                        | 22         |
| <i>MUC6</i> ; 76.6   | miR-6815-3p    | 1218              | -104                 | 91                        | 21         |
|                      | ID02841.5p-miR | 1238              | -108                 | 93                        | 20         |
|                      | miR-939-5p     | 1330              | -121                 | 88                        | 24         |
| <i>OGG1</i> ; 10.8   | ID00920.5p-miR | 882               | -134                 | 94                        | 24         |
| <i>PARP1</i> ; 15.9  | ID01616.3p-miR | 1275              | -119                 | 90                        | 23         |
| <i>PGC</i> ; 963.7   | ID01303.5p-miR | 715               | -115                 | 92                        | 20         |
| <i>SIRT1</i> ; 13.2  | miR-4767       | 236               | -134                 | 94                        | 23         |
|                      | ID01560.3p-miR | 264               | -123                 | 89                        | 23         |
|                      | ID03332.3p-miR | 280, 287          | -132, 138            | 89, 93                    | 24         |
|                      | ID00278.3p-miR | 294               | -123                 | 89                        | 23         |
|                      | ID00811.3p-miR | 300               | -125                 | 88                        | 24         |

**Table S4: The characteristics of the miRNA interactions with 3'UTR mRNAs of gastric cancer candidate genes**

| <b>Gene; NX</b>       | <b>miRNA</b>   | <b>Start of site, nt</b> | <b><math>\Delta G</math>, kJ/mole</b> | <b><math>\Delta G/\Delta G_m</math>, %</b> | <b>Length, nt</b> |
|-----------------------|----------------|--------------------------|---------------------------------------|--------------------------------------------|-------------------|
| <i>AQP3</i> ; 3.9     | miR-466        | 1255                     | -106                                  | 91                                         | 23                |
|                       | ID00436.3p-miR | 1255                     | -104                                  | 89                                         | 23                |
|                       | ID01030.3p-miR | 1259, 1269               | -108                                  | 89                                         | 23                |
| <i>BRCA1</i> ; 5.1    | miR-5095       | 6406                     | -106                                  | 91                                         | 21                |
|                       | miR-619-5p     | 6412                     | -119                                  | 98                                         | 22                |
|                       | miR-5096       | 6486                     | -110                                  | 98                                         | 21                |
|                       | miR-5585-3p    | 6554                     | -110                                  | 95                                         | 22                |
| <i>CASP10</i> ; 8.7   | miR-1273h-5p   | 2234                     | -106                                  | 91                                         | 21                |
|                       | miR-1285-3p    | 2357                     | -106                                  | 91                                         | 22                |
|                       | miR-1273g-3p   | 2589                     | -108                                  | 93                                         | 21                |
|                       | miR-1273d      | 2623                     | -119                                  | 87                                         | 25                |
|                       | miR-1273h-5p   | 2623                     | -117                                  | 100                                        | 21                |
|                       | miR-619-5p     | 3247                     | -113                                  | 93                                         | 22                |
|                       | miR-5585-3p    | 3389                     | -108                                  | 93                                         | 22                |
| <i>CCND1</i> ; 19.2   | miR-574-5p     | 2593+2597 (3)            | -108+-113                             | 89+93                                      | 23                |
|                       | ID00470.5p-miR | 2595, 2597               | -108                                  | 89                                         | 23                |
| <i>CDH1</i> ; 21.6    | miR-1273c      | 3251                     | -110                                  | 91                                         | 22                |
|                       | miR-1273g-3p   | 3271                     | -108                                  | 93                                         | 21                |
|                       | miR-1273h-5p   | 3305                     | -113                                  | 96                                         | 21                |
| <i>CDH17</i> ; 0.3    | miR-1273a      | 2773                     | -119                                  | 90                                         | 25                |
|                       | miR-1273g-3p   | 2795                     | -110                                  | 95                                         | 21                |
|                       | miR-1273d      | 2829                     | -121                                  | 89                                         | 25                |
| <i>CDKN1A</i> ; 25.2  | miR-4433-3p    | 1601                     | -106                                  | 91                                         | 21                |
| <i>CEACAM5</i> ; 20.1 | miR-5585-3p    | 2441                     | -108                                  | 93                                         | 22                |
|                       | miR-5095       | 3229                     | -115                                  | 98                                         | 21                |
|                       | miR-619-5p     | 3235                     | -119                                  | 98                                         | 22                |
|                       | miR-5585-3p    | 3378                     | -113                                  | 96                                         | 22                |
| <i>CLDN18</i> ; 126.9 | miR-5095       | 1852                     | -106                                  | 91                                         | 21                |
|                       | miR-619-5p     | 1858                     | -115                                  | 95                                         | 22                |
|                       | miR-1273h-3p   | 2053                     | -113                                  | 90                                         | 22                |
| <i>CREB1</i> ; 13.3   | miR-5095       | 2791                     | -110                                  | 95                                         | 21                |
|                       | miR-619-5p     | 2797                     | -119                                  | 98                                         | 22                |
|                       | miR-5096       | 2871                     | -106                                  | 94                                         | 21                |
|                       | miR-619-5p     | 2932                     | -110                                  | 91                                         | 22                |
|                       | miR-5585-3p    | 2939                     | -108                                  | 93                                         | 22                |
| <i>ERBB3</i> ; 32.9   | miR-619-5p     | 4950                     | -117                                  | 96                                         | 22                |
|                       | miR-619-5p     | 5104                     | -121                                  | 100                                        | 22                |
| <i>HPSE</i> ; 2.4     | miR-1273g-3p   | 2081                     | -106                                  | 91                                         | 21                |
|                       | miR-1273g-3p   | 2376                     | -108                                  | 93                                         | 21                |
|                       | miR-5095       | 2759                     | -106                                  | 91                                         | 21                |
|                       | miR-619-5p     | 2765                     | -110                                  | 91                                         | 22                |
|                       | miR-5096       | 2839                     | -110                                  | 98                                         | 21                |
| <i>IL10</i> ; 2.0     | miR-5095       | 1210                     | -115                                  | 98                                         | 21                |
|                       | miR-619-5p     | 1216                     | -119                                  | 98                                         | 22                |
|                       | miR-5096       | 1290                     | -106                                  | 94                                         | 21                |
| <i>IRF1</i> ; 17.5    | miR-5095       | 2229                     | -110                                  | 95                                         | 21                |
|                       | miR-619-5p     | 2235                     | -115                                  | 95                                         | 22                |
|                       | miR-619-5p     | 2523                     | -110                                  | 91                                         | 22                |
|                       | miR-5096       | 2597                     | -110                                  | 98                                         | 21                |
|                       | miR-5095       | 2653                     | -110                                  | 95                                         | 21                |

|                      |                |               |            |        |    |
|----------------------|----------------|---------------|------------|--------|----|
|                      | miR-619-5p     | 2659          | -119       | 98     | 22 |
|                      | miR-5585-3p    | 2800          | -110       | 95     | 22 |
| <i>KRAS</i> ; 23.6   | ID03224.5p-miR | 3163          | -121       | 92     | 23 |
|                      | miR-1273g-3p   | 3176          | -108       | 93     | 21 |
|                      | miR-1273f      | 3209          | -104       | 100    | 19 |
| <i>LEP</i> ; 0.2     | miR-5095       | 3094          | -110       | 95     | 21 |
|                      | miR-619-5p     | 3100          | -119       | 98     | 22 |
|                      | miR-5096       | 3172          | -104       | 92     | 21 |
|                      | miR-5585-3p    | 3240          | -108       | 93     | 22 |
| <i>MACC1</i> ; 5.0   | ID01030.3p-miR | 2962, 2976    | -108       | 89     | 23 |
|                      | ID01727.5p-miR | 2963÷2981 (3) | -104       | 89     | 23 |
|                      | miR-466        | 2966÷2990 (4) | -104÷-106  | 89÷91  | 23 |
|                      | ID01030.3p-miR | 3949÷3965 (8) | -108÷-110  | 89÷91  | 23 |
|                      | miR-466        | 3951÷3967 (9) | -106÷-108  | 91÷93  | 23 |
|                      | ID00436.3p-miR | 3953÷3967 (8) | -104÷-106  | 89÷91  | 23 |
|                      | miR-619-5p     | 4856          | -117       | 96     | 22 |
|                      | miR-1273f      | 5717          | -102       | 98     | 19 |
|                      | miR-1273d      | 5718          | -123       | 91     | 25 |
| <i>MDM2</i> ; 9.8    | miR-1273g-3p   | 2117          | -113       | 96     | 21 |
|                      | miR-1273g-3p   | 2486          | -106       | 91     | 21 |
|                      | miR-1273e      | 2521          | -108       | 93     | 22 |
|                      | miR-1273g-3p   | 6739          | -113       | 96     | 21 |
| <i>MTHFR</i> ; 13.6  | miR-5095       | 6855          | -110       | 95     | 21 |
|                      | miR-619-5p     | 6861          | -115       | 95     | 22 |
|                      | miR-5585-3p    | 7003          | -110       | 95     | 22 |
| <i>MUC6</i> ; 76.6   | ID01401.3p-miR | 7895          | -108       | 91     | 21 |
| <i>PDCD4</i> ; 27.6  | miR-5095       | 3215          | -106       | 91     | 21 |
|                      | miR-619-5p     | 3221          | -121       | 100    | 22 |
|                      | miR-619-5p     | 3355          | -110       | 91     | 22 |
| <i>PRKAA1</i> ; 22.1 | miR-1273g-3p   | 2260          | -110       | 95     | 21 |
|                      | miR-1273f      | 2293          | -102       | 98     | 19 |
|                      | miR-1273d      | 2294          | -121       | 89     | 25 |
|                      | ID01404.5p-miR | 2297          | -113       | 91     | 23 |
|                      | miR-1273e      | 2303          | -106       | 91     | 22 |
| <i>SMAD4</i> ; 19.3  | ID01838.5p-miR | 4291          | -113       | 90     | 24 |
|                      | miR-1273g-3p   | 4312          | -110       | 95     | 21 |
|                      | ID01656.3p-miR | 4342          | -115       | 89     | 23 |
|                      | miR-1273d      | 4346          | -119       | 87     | 25 |
|                      | ID01404.5p-miR | 4349          | -115       | 93     | 23 |
|                      | ID02732.3p-miR | 7721          | -123       | 91     | 23 |
|                      | miR-574-5p     | 7740÷7756 (8) | -108÷-113  | 89÷93  | 23 |
|                      | ID00470.5p-miR | 7744÷7752 (5) | -108       | 89     | 23 |
|                      | ID00106.5p-miR | 7825          | -106       | 91     | 22 |
|                      | miR-574-5p     | 7830          | -108       | 89     | 23 |
| <i>STAT3</i> ; 29.4  | miR-5095       | 3125          | -106       | 91     | 21 |
|                      | miR-619-5p     | 3131          | -119       | 98     | 22 |
|                      | miR-5585-3p    | 3268          | -110       | 95     | 22 |
| <i>TGFB1</i> ; 12.8  | miR-6089       | 2060, 2065    | -132, -136 | 89, 91 | 24 |
|                      | ID03306.3p-miR | 2060          | -123       | 94     | 21 |
|                      | ID01382.3p-miR | 2062          | -113       | 93     | 20 |
|                      | ID03208.5p-miR | 2066          | -125       | 88     | 24 |
|                      | miR-4651       | 2087          | -113       | 95     | 20 |
|                      | ID00978.5p-miR | 2089          | -119       | 90     | 22 |
|                      | ID00296.3p-miR | 2093          | -140       | 89     | 25 |

|                     |                |      |      |    |    |
|---------------------|----------------|------|------|----|----|
|                     | miR-1183       | 4361 | -132 | 90 | 27 |
| <i>TIMP2</i> ; 24.2 | ID01941.5p-miR | 1427 | -117 | 89 | 24 |
| <i>TIMP3</i> ; 22.9 | miR-1224-5p    | 3268 | -104 | 96 | 19 |
| <i>TP53</i> ; 12.0  | ID00548.3p-miR | 1393 | -115 | 89 | 23 |
|                     | ID02379.3p-miR | 1397 | -119 | 89 | 24 |
|                     | miR-1273c      | 2297 | -110 | 91 | 22 |
|                     | miR-1285-3p    | 2301 | -110 | 95 | 22 |
|                     | miR-1273g-3p   | 2317 | -106 | 91 | 21 |
|                     | miR-1273h-5p   | 2351 | -106 | 91 | 21 |
|                     | ID01838.5p-miR | 2460 | -110 | 88 | 24 |
|                     | ID00785.5p-miR | 2520 | -113 | 90 | 23 |







|                                                                                                                        |                                                                                                                        |
|------------------------------------------------------------------------------------------------------------------------|------------------------------------------------------------------------------------------------------------------------|
| <i>ATM</i> , miR-1273a, 11054, -119, 90<br>5'-GACAGAGUCUUGCUCUCUACCC-3'<br>     <br>3'-UUCUUUCUCAGAAACAGCGGG-5'        | <i>ATM</i> , miR-1273c, 11056, -104, 86<br>5'-GACAGAGUCUUGCUCUCUACCC-3'<br>     <br>3'-CUGUCCAGAGCAAAACAGCGG-5'        |
| <i>ATM</i> , miR-1273e, 11119, -108, 93<br>5'-UCUGCCUCCUGGUCAAGCAA-3'<br>     <br>3'-AGGUGAAGGACCAAGUUCGUU-5'          | <i>ATM</i> , miR-1273f, 11109, -89, 86<br>5'-CACUGAACCCUCCUCC-3'<br>     <br>3'-GUGACGUUGGAGUAGAGG-5'                  |
| <i>ATM</i> , miR-1273g-3p, 11076, -113, 96<br>5'-CCAGGGCGGAGUCAGUGGC-3'<br>     <br>3'-GAGUCCGACCUACGUCACCA-5'         | <i>CASP10</i> , miR-1273d, 2623, -119, 87<br>5'-ACUGAGCCUCCUCCUCCAGUUC-3'<br>     <br>3'-UGACGUCGAGUUGGAGUACCAAG-5'    |
| <i>CASP10</i> , miR-1273f, 2622, -89, 86<br>5'-CACUGAGCCUUGACUCC-3'<br>     <br>3'-GUGACGUUGGAGUAGAGG-5'               | <i>CASP10</i> , miR-1273g-3p, 2589, -108, 93<br>5'-CCUGGCGUGAGUCAGUGGU-3'<br>     <br>3'-GAGUCCGACCUACGUCACCA-5'       |
| <i>CASP10</i> , miR-1273h-5p, 2234, -106, 91<br>5'-ACUGUAGUCUCCAGUCCUCCAG-3'<br>     <br>3'-UGACGUCGAGUUGGAGUACCAAG-5' | <i>CASP10</i> , miR-1273h-5p, 2623, -117, 100<br>5'-ACUGAGCCUUGACUCCUCCAG-3'<br>     <br>3'-UGACGUCGAGUUGGAGUACCAAG-5' |
| <i>CDH1</i> , miR-1273g-3p, 3271, -108, 93<br>5'-CCAGGCGGAGUCAGUGGU-3'<br>     <br>3'-GAGUCCGACCUACGUCACCA-5'          | <i>CDH1</i> , miR-1273h-5p, 3305, -113, 96<br>5'-ACUGAGCCUUGACUCCUCCAG-3'<br>     <br>3'-UGACGUCGAGUUGGAGUACCAAG-5'    |
| <i>CDH1</i> , miR-1273c, 3251, -110, 91<br>5'-GACAGGUCUCAUUCUUCGCCC-3'<br>     <br>3'-CUGUCCAGAGCAAAACAGCGG-5'         | <i>CDH17</i> , miR-1273a, 2773, -119, 90<br>5'-GAGGUGAGUCUUGUCUUGCGCC-3'<br>     <br>3'-UUCUUUCAGAAACAGCGGG-5'         |
| <i>CDH17</i> , miR-1273d, 2829, -121, 89<br>5'-ACUGCAACUCCUCCUCCUGGUUC-3'<br>     <br>3'-UGACGUCGAGUUGGAGUACCAAG-5'    | <i>CDH17</i> , miR-1273f, 2828, -100, 96<br>5'-GACUGCAACUCCUCCUCCUCC-3'<br>     <br>3'-GUGACGUUGGAGUAGAGG-5'           |
| <i>CDH17</i> , miR-1273g-3p, 2795, -110, 95<br>5'-CCAGGCGGAGUACAGUGGU-3'<br>     <br>3'-GAGUCCGACCUACGUCACCA-5'        | <i>HPSE</i> , miR-1273c, 2356, -104, 86<br>5'-GACAGGUAUCAUUCUUGUCC-3'<br>     <br>3'-CUGUCCAGAGCAAAACAGCGG-5'          |
| <i>HPSE</i> , miR-1273g-3p, 2081, -106, 91<br>5'-CCAGGCGGAGUCCAUUGGU-3'<br>     <br>3'-GAGUCCGACCUACGUCACCA-5'         | <i>HPSE</i> , miR-1273g-3p, 2376, -108, 93<br>5'-CCAGGCGUAGUGGAGUAGUGGU-3'<br>     <br>3'-GAGUCCGACCUACGUCACCA-5'      |
| <i>KRAS</i> , miR-1273e, 3219, -102, 87<br>5'-DCAUCUCCAGGUCAAGCGA-3'<br>     <br>3'-AGGUGAAGGACCAAGUUCGUU-5'           | <i>KRAS</i> , miR-1273f, 3209, -104, 100<br>5'-CACUGAACCCUCCUCCUCC-3'<br>     <br>3'-GUGACGUUGGAGUAGAGG-5'             |
| <i>KRAS</i> , miR-1273g-3p, 3176, -108, 93<br>5'-CCAGGCGGAAUGCAGUGGC-3'<br>     <br>3'-GAGUCCGACCUACGUCACCA-5'         | <i>KRAS</i> , miR-1273h-5p, 3210, -100, 85<br>5'-ACUGCAACUCCUCCUCCAG-3'<br>     <br>3'-UGACGUCGAGUUGGAGUACCAAG-5'      |
| <i>MACC1</i> , miR-1273d, 5718, -123, 91<br>5'-ACUGCAACUCCUCCUCCUGGUUC-3'<br>     <br>3'-UGACGUCGAGUUGGAGUACCAAG-5'    | <i>MACC1</i> , miR-1273e, 5727, -102, 87<br>5'-DCAUCUCCAGGUCAAGCGA-3'<br>     <br>3'-AGGUGAAGGACCAAGUUCGUU-5'          |
| <i>MACC1</i> , miR-1273f, 5717, -10, 98<br>5'-CACUGCAACUCCUCCUCC-3'<br>     <br>3'-GUGACGUUGGAGUAGAGG-5'               | <i>MACC1</i> , miR-1273g-3p, 5684, -102, 87<br>5'-CCAGGCGGAGUCCGUGGUU-3'<br>     <br>3'-GAGUCCGACCUACGUCACCA-5'        |
| <i>MACC1</i> , miR-1273g-5p, 5714, -104, 87<br>5'-ACUCACUGCAACUCCUCCUCC-3'<br>     <br>3'-UGACGUCGAGUUGGAGUACCAAG-5'   | <i>MDM2</i> , miR-1273a, 2795, -113, 85<br>5'-GACAGAGUCUUGCUCCUCCUCC-3'<br>     <br>3'-GUGACGUUGGAGUAGAGG-5'           |
| <i>MDM2</i> , miR-1273c, 3215, -104, 86<br>5'-GACAGGUCUCCUCCUCCUCC-3'<br>     <br>3'-CUGUCCAGAGCAAAACAGCGG-5'          | <i>MDM2</i> , miR-1273e, 2521, -108, 93<br>5'-UCCGCUCCCGGUAACAGCCA-3'<br>     <br>3'-AGGUGAAGGACCAAGUUCGUU-5'          |
| <i>MDM2</i> , miR-1273e, 2860, -104, 89<br>5'-UCUGCCUCCUCCUCCUCCUCC-3'<br>     <br>3'-AGGUGAAGGACCAAGUUCGUU-5'         | <i>MDM2</i> , miR-1273f, 2850, -91, 88<br>5'-CACUGCAACUCCUCCUCC-3'<br>     <br>3'-GUGACGUUGGAGUAGAGG-5'                |
| <i>MDM2</i> , miR-1273f, 6772, -96, 92<br>5'-CACUGCAACUCCUCCUCC-3'<br>     <br>3'-GUGACGUUGGAGUAGAGG-5'                | <i>MDM2</i> , miR-1273g-3p, 2117, -113, 96<br>5'-CCAGGCGGAGUCCUCCUCCAG-3'<br>     <br>3'-GAGUCCGACCUACGUCACCA-5'       |
| <i>MDM2</i> , miR-1273g-3p, 2486, -106, 91<br>5'-CCAGGCGGAGUCCUCCUCCAG-3'<br>     <br>3'-GAGUCCGACCUACGUCACCA-5'       | <i>MDM2</i> , miR-1273g-3p, 6739, -113, 96<br>5'-CUCAGGCGUAGUCCAGUGGU-3'<br>     <br>3'-GAGUCCGACCUACGUCACCA-5'        |
| <i>PRKAA1</i> , miR-1273d, 2294, -121, 89<br>5'-ACUGCAACUCCUCCUCCUCCUCC-3'<br>     <br>3'-UGACGUCGAGUUGGAGUACCAAG-5'   | <i>PRKAA1</i> , miR-1273e, 2303, -106, 91<br>5'-UCCACUCCCGGUAACAGUGA-3'<br>     <br>3'-AGGUGAAGGACCAAGUUCGUU-5'        |
| <i>PRKAA1</i> , miR-1273f, 2293, -102, 98<br>5'-CACUGCAACUCCUCCUCC-3'<br>     <br>3'-GUGACGUUGGAGUAGAGG-5'             | <i>PRKAA1</i> , miR-1273g-3p, 2260, -110, 95<br>5'-CCAGGCGUAGUCCUCCUCCAG-3'<br>     <br>3'-GAGUCCGACCUACGUCACCA-5'     |
| <i>PRKAA1</i> , miR-1273g-5p, 2290, -102, 86<br>5'-GUCACUGCAACUCCUCCUCC-3'<br>     <br>3'-UGACGUCGAGUUGGAGUACCAAG-5'   | <i>PRKAA1</i> , miR-1273h-5p, 2294, -102, 87<br>5'-ACUGCAACUCCUCCUCCCG-3'<br>     <br>3'-GUGACGUUGGAGUAGAGG-5'         |
| <i>SGCB</i> , miR-1273a, 3312, -113, 85<br>5'-GACAGAGUCUUGCUCUCUACCC-3'<br>     <br>3'-UUCUUUCUCAGAAACAGCGGG-5'        | <i>SGCB</i> , miR-1273c, 3314, -110, 91<br>5'-GACAGAGUCUUGCUCUCUACCC-3'<br>     <br>3'-CUGUCCAGAGCAAAACAGCGG-5'        |
| <i>SGCB</i> , miR-1273e, 3383, -100, 85<br>5'-UCUGCCUCCAGGUCAAGCGA-3'<br>     <br>3'-AGGUGAAGGACCAAGUUCGUU-5'          | <i>SGCB</i> , miR-1273f, 3373, -96, 92<br>5'-CACUGCAACUCCUCCUCC-3'<br>     <br>3'-GUGACGUUGGAGUAGAGG-5'                |
| <i>SGCB</i> , miR-1273g-3p, 3333, -106, 91<br>5'-CCAGGCGGAGUCCUCCUCCAG-3'<br>     <br>3'-UGACGUCGAGUUGGAGUACCAAG-5'    | <i>SGCB</i> , miR-1273h-5p, 3374, -102, 87<br>5'-ACUGCAACUCCUCCUCCUCCAG-3'<br>     <br>3'-UGACGUCGAGUUGGAGUACCAAG-5'   |
| <i>TP53</i> , miR-1273a, 2295, -113, 85<br>5'-GACAGGUCUCCUCCUCCUCCUCC-3'<br>     <br>3'-UUCUUUCUCAGAAACAGCGGG-5'       | <i>TP53</i> , miR-1273c, 2297, -110, 91<br>5'-GACUGGUCUCCUCCUCCUCCUCC-3'<br>     <br>3'-CUGUCCAGAGCAAAACAGCGG-5'       |
| <i>TP53</i> , miR-1273g-3p, 2317, -106, 91<br>5'-CCAGGCGGAGUCCUCCUCCAG-3'<br>     <br>3'-GAGUCCGACCUACGUCACCA-5'       | <i>TP53</i> , miR-1273g-5p, 2347, -102, 86<br>5'-GCUACUGAGCCUCCUCCUCC-3'<br>     <br>3'-UGAAGGACGUCCAGUUGGUGG-5'       |
| <i>POU5F1</i> , miR-1273a, 181*, -119, 90<br>5'-GACAGAGUCUUGCUCUCUACCC-3'<br>     <br>3'-UUCUUUCUCAGAAACAGCGGG-5'      | <i>POU5F1</i> , miR-1273c, 183*, -104, 86<br>5'-GACAGAGUCUUGCUCUCUACCC-3'<br>     <br>3'-CUGUCCAGAGCAAAACAGCGG-5'      |
| <i>POU5F1</i> , miR-1273d, 237*, -119, 87<br>5'-ACUGCAACUCCUCCUCCUCCUCC-3'<br>     <br>3'-UGACGUCGAGUUGGAGUACCAAG-5'   | <i>POU5F1</i> , miR-1273e, 246*, -104, 89<br>5'-UCCGCUCCCGGUAACAGUGA-3'<br>     <br>3'-AGGUGAAGGACCAAGUUCGUU-5'        |
| <i>POU5F1</i> , miR-1273f, 236*, -100, 96<br>5'-CACUGCAACUCCUCCUCCUCC-3'<br>     <br>3'-GUGACGUUGGAGUAGAGG-5'          | <i>POU5F1</i> , miR-1273g-3p, 203*, -113, 96<br>5'-CCAGGCGGAGUCCUCCUCCAG-3'<br>     <br>3'-GAGUCCGACCUACGUCACCA-5'     |

Note. The top line contains sequentially: gene; miRNA; the beginning of the binding site; nt; AG, kJ/mole; AG/AGm,%. \* - the miRNA binding site is located in the 5'UTR. The top line of the diagram is the nucleotide sequence of the miRNA binding site; the bottom line is the nucleotide sequence of the mRNA. Non-canonical pairs are in bold.

Figure S9: The schemes of miR-1273 family interaction in the 3'UTR of mRNA of candidate gastric cancer genes





|                                                                                                                                                                                                                                                                                                                                                                                                          |                                                                                                                                                                                    |
|----------------------------------------------------------------------------------------------------------------------------------------------------------------------------------------------------------------------------------------------------------------------------------------------------------------------------------------------------------------------------------------------------------|------------------------------------------------------------------------------------------------------------------------------------------------------------------------------------|
| <p><i>CCND1</i>, miR-574-5p, 2595, -113, 93<br/> 5'-ACACACACACACACACACACA-3'<br/>                   <br/> 3'-UGUGUGAGUGUGUGUGAGU-5'</p>                                                                                                                                                                                                                                                                  | <p><i>CCND1</i>, ID00470.5p-miR, 2595, -108, 89<br/> 5'-ACACACAC<b>ACACACACACACA</b>-3'<br/>                                       <br/> 3'-UGUGUGUG<b>CGUAUGUGUGCAUGU</b>-5'</p>  |
| <p><i>IGF1</i>, miR-574-5p, 4042, -113, 93<br/> 5'-ACACACACACACACACACACA-3'<br/>                   <br/> 3'-UGUGUGAGUGUGUGUGAGU-5'</p>                                                                                                                                                                                                                                                                   | <p><i>IGF1</i>, ID00470.5p-miR, 4042, -108, 89<br/> 5'-ACACACAC<b>ACACACACACACA</b>-3'<br/>                                       <br/> 3'-UGUGUGUG<b>CGUAUGUGUGCAUGU</b>-5'</p>   |
| <p><i>IGF2</i>, miR-574-5p; 2299; -106; 88<br/> 5'-ACACACGCACACACA<b>UGCACACA</b>-3'<br/>                   <br/> 3'-UGUGUGAGUGUGUGUG<b>UGUGAGU</b>-5'</p>                                                                                                                                                                                                                                               | <p><i>IGF2</i>, ID00470.5p-miR; 2297; -113; 93<br/> 5'-ACACACACGCACACACA<b>UGCACA</b>-3'<br/>                                       <br/> 3'-UGUGUGUG<b>CGUAUGUGUGCAUGU</b>-5'</p> |
| <p><i>IGF2</i>, miR-574-5p; 2343; -106; 88<br/> 5'-ACACACGCACACACA<b>UGCACACA</b>-3'<br/>                   <br/> 3'-UGUGUGAGUGUGUGUG<b>UGUGAGU</b>-5'</p>                                                                                                                                                                                                                                               | <p><i>IGF2</i>, ID00470.5p-miR; 2341; -113; 93<br/> 5'-ACACACACGCACACACA<b>UGCACA</b>-3'<br/>                                       <br/> 3'-UGUGUGUG<b>CGUAUGUGUGCAUGU</b>-5'</p> |
| <p><i>IGF2</i>, miR-574-5p; 2522; -108; 89<br/> 5'-ACACA<b>UGCACACACAGCACACA</b> - 3'<br/>                       <br/> 3'-UGUGUG<b>AGUGUGUGU</b>-GUGUGAGU - 5'</p>                                                                                                                                                                                                                                       | <p><i>IGF2</i>, ID00470.5p-miR; 2520; -108; 89<br/> 5'-ACACACA<b>UGCACACACAGCACACA</b>-3'<br/>                                   <br/> 3'-UGUGUGUG<b>CGUAUGUGU</b>-GCAUGU-5'</p>   |
| <p><i>IGF2</i>, miR-574-5p; 2835; -104; 86<br/> 5'-ACACACA<b>UGCAGCACACACGCA</b>-3'<br/>                   <br/> 3'-UGUGUGA<b>GUGUGUGUGAGU</b>-5'</p>                                                                                                                                                                                                                                                    | <p><i>IGF2</i>, ID00470.5p-miR; 2837; -110; 91<br/> 5'-ACACA<b>UGCAGCACACACGCA</b>-3'<br/>                                       <br/> 3'-UGUGUG<b>UGCGUAUGUGUGCAUGU</b>-5'</p>    |
| <p><i>SMAD4</i>, miR-574-5p, 7744, -113, 93<br/> 5'-ACACACACACACACACACA-3'<br/>                   <br/> 3'-UGUGUGAGUGUGUGUGAGU-5'</p>                                                                                                                                                                                                                                                                    | <p><i>SMAD4</i>, ID00470.5p-miR, 7744, -108, 89<br/> 5'-ACACACAC<b>ACACACACACA</b>- 3'<br/>                                       <br/> 3'-UGUGUGUG<b>CGUAUGUGUGCAUGU</b>-5'</p>   |
| <p><i>XRCC1</i>, miR-574-5p, 2035, -113, 93<br/> 5'-ACACACACACACACACACA-3'<br/>                   <br/> 3'-UGUGUGAGUGUGUGUGAGU-5'</p>                                                                                                                                                                                                                                                                    | <p><i>XRCC1</i>, ID00470.5p-miR, 2035, -108, 89<br/> 5'-ACACACAC<b>ACACACACACA</b>-3'<br/>                                       <br/> 3'-UGUGUGUG<b>CGUAUGUGUGCAUGU</b>-5'</p>    |
| <p><i>ZEB1</i>, miR-574-5p, 3587, -113, 93<br/> 5'-ACACACACACACACACACA-3'<br/>                   <br/> 3'-UGUGUGAGUGUGUGUGAGU-5'</p>                                                                                                                                                                                                                                                                     | <p><i>ZEB1</i>, ID00470.5p-miR, 3587, -108, 89<br/> 5'-ACACACAC<b>ACACACACACA</b>-3'<br/>                                       <br/> 3'-UGUGUGUG<b>CGUAUGUGUGCAUGU</b>-5'</p>     |
| <p>Note. The top line contains sequentially: gene; miRNA; the beginning of the binding site, nt; <math>\Delta G</math>, kJ/mole; <math>\Delta G/\Delta G_m</math>,%. * - the miRNA binding site is located in the 5'UTR. The top line of the diagram is the nucleotide sequence of the miRNA binding site; the bottom line is the nucleotide sequence of the miRNA. Non-canonical pairs are in bold.</p> |                                                                                                                                                                                    |

**Figure S11:** The schemes of interaction of miR-574-5p and ID00470.5p-miR in the 3'UTR of mRNA of candidate gastric cancer genes
